# Supplementary material
Source: MDPI journal article supplement (https://www.mdpi.com/1999-4907/14/9/1914)
Supplement: s1 [file s1]

**Table S1.** Characteristics of sampling sites in *Larix* plantations.

| Stand site | Sampling site basic conditions |                    |                  |                              |             |             |
|------------|--------------------------------|--------------------|------------------|------------------------------|-------------|-------------|
|            | Slope<br>(°)                   | Mean height<br>(m) | Mean DBH<br>(cm) | SBD<br>(g cm <sup>-3</sup> ) | MAP<br>(mm) | MAT<br>(°C) |
| Lar15-1    | 20                             | 13.4               | 12.6             | 1.34                         | 1820        | 15.8        |
| Lar15-2    | 18                             | 14.9               | 11.4             | 1.41                         |             |             |
| Lar15-3    | 21                             | 10                 | 11.2             | 1.33                         |             |             |
| Lar24-1    | 18                             | 16.9               | 14.3             | 1.27                         | 1850        | 16.2        |
| Lar24-2    | 17                             | 15.2               | 13.0             | 1.38                         |             |             |
| Lar24-3    | 19                             | 11.2               | 12.1             | 1.30                         |             |             |
| Lar40-1    | 25                             | 20                 | 17.3             | 1.19                         | 1880        | 16.3        |
| Lar40-2    | 21                             | 17.4               | 18.0             | 1.30                         |             |             |
| Lar40-3    | 23                             | 18.6               | 19.6             | 1.28                         |             |             |
| Lar50-1    | 24                             | 19.5               | 25.7             | 1.18                         | 1930        | 16.6        |
| Lar50-2    | 26                             | 16.4               | 21.7             | 1.19                         |             |             |
| Lar50-3    | 25                             | 16.8               | 19.6             | 1.25                         |             |             |

Values: mean ± standard error. DBH: diameter at breast height; SBD: soil bulk density; MAP: mean annual precipitation; MAT: mean annual temperature; Lar15: young plantation; Lar24: middle-aged plantation; Lar40: near-mature plantation; Lar50: mature plantation.

**Table S2.** Species diversity of understory vegetation characteristics in *Larix* plantations.

| Treatments | Herbaceous biodiversity |                |                | Shrub biodiversity |                |                |
|------------|-------------------------|----------------|----------------|--------------------|----------------|----------------|
|            | Shannon index           | Richness index | Evenness index | Shannon index      | Richness index | Evenness index |
| Lar15      | 2.79±0.28a              | 24.67±0.58a    | 0.89±0.01a     | 1.54±0.12a         | 5.00±2.00a     | 0.86±0.02a     |
| Lar24      | 3.16±0.17a              | 25.33±1.15a    | 0.91±0.01a     | 1.59±0.05a         | 5.67±2.08a     | 0.88±0.01a     |
| Lar40      | 3.19±0.09a              | 28.00±4.58a    | 0.94±0.02a     | 1.72±0.07a         | 6.33±1.53a     | 0.89±0.02a     |
| Lar50      | 3.21±0.22a              | 29.67±3.79a    | 0.96±0.01a     | 1.78±0.28a         | 6.67±1.53a     | 0.93±0.02a     |

Values: mean ± standard error. Different lowercase letters indicate significant differences between treatments within a measured nutrient ( $P < 0.05$ ). Lar15: young plantation; Lar24: middle-aged plantation; Lar40: near-mature plantation; Lar50: mature plantation.

**Table S3.** PLFAs biomarkers used to characterize microbial community structure.

| Microbial community types                  | PLFAs                                                                                                              | Reference                                                                                                       |
|--------------------------------------------|--------------------------------------------------------------------------------------------------------------------|-----------------------------------------------------------------------------------------------------------------|
| Gram - positive bacteria (G <sup>+</sup> ) | i13:0, i14:0, a14:0, a15:0, i15:0, i16:0, a17:0, i17:0, i18:0                                                      | Fichtner et al. (2014), Kourtev et al. (2002)                                                                   |
| Gram – negative bacteria (G <sup>-</sup> ) | 10:0 2OH, 15:1 w4c, 15:1 w6c, 16:0 2OH, 16:1 w6c, 16:1 w7c, 16:1 w9c, cy17:0, 17:1 w8c, 18:1 w5c, 18:1 w7c, cy19:0 | Bossio et al. (2006), Fichtner et al. (2014), Gavazov et al. (2017)                                             |
| Bacteria                                   | G <sup>+</sup> , G <sup>-</sup> , 14:0, 15:0, 17:0, 18:0                                                           | Bossio et al. (2006), Fichtner et al. (2014), Gavazov et al. (2017), Kourtev et al. (2002), Myers et al. (2001) |
| Fungi                                      | 16:1 w5c, 18:1 w9c, 18:2 w6c, 18:2 w9c                                                                             | Kourtev et al. (2002), Zhang et al. (2014)                                                                      |
| Actinomycete                               | 10 Me 16:0, 10 Me 17:0, 10 Me 18:0                                                                                 | Brockett et al. (2012)                                                                                          |
| Other PLFAs                                | 14:0, 16:0, 16:1 2OH, 16:1ω9c, 17:1ω8c, 18:1ω9c and 18:3ω6c                                                        | Chen et al., (2016), Frostergård & Bååth, (1996)                                                                |

Note: To categorize soil microbial groups, we utilized established content fatty acid methyl esters (i.e., 19:0) as an internal standard.

## Reference

1. Fichtner, A.; von Oheimb, G.; Härdtle, W.; Wilken, C.; Gutknecht, J.L.M. Effects of anthropogenic disturbances on soil microbial communities in oak forests persist for more than 100 years. *Soil Biol. Biochem.* **2014**. *70*, 79-87. doi: 10.1016/j.soilbio.2013.12.015.
2. Kourtev, P.S.; Ehrenfeld, J.G.; Häggblom, M. Exotic plant species alter the microbial community structure and function in the soil. *Ecology* **2002**. *83*, 3152-3166. doi: 10.2307/3071850.
3. Bossio, D.A.; Fleck, J.A.; Scow, K.M.; Fujii, R. Alteration of soil microbial communities and water quality in restored wetlands. *Soil Biol. Biochem.* **2006**. *38*, 1223-1233. doi: 10.1016/j.soilbio.2005.09.027.
4. Gavazov, K.; Ingrisch, J.; Hasibeder, R.; Mills, R.T.; Buttler, A.; Gleixner, G.; Pumpanen, J.; Bahn, M. Winter ecology of a subalpine grassland: effects of snow removal on soil respiration, microbial structure and function. *Sci. Total Environ.* **2017**. *590–591*, 316–324. doi: 10.1016/j.scitotenv.2017.03.010.
5. Myers, R.T.; Zak, D.R.; White, D.C.; Peacock, A. Landscape-level patterns of microbial community composition and substrate use in upland forest ecosystems. *Soil Sci. Soc. Am. J.* **2001**. *65*, 359-367. doi: 10.2136/sssaj2001.652359x.

6. Zhang, B.; Li, Y.; Ren, T.; Tian, Z.; Wang, G.; He, X.; Tian, C. Short-term effect of tillage and crop rotation on microbial community structure and enzyme activities of a clay loam soil. *Biol. Fertil. Soils* **2014**, *50*, 1077-1085. doi: 10.1007/s00374-014-0929-4.
7. Brockett, B.F.T.; Prescott, C.E.; Grayston, S.J. Soil moisture is the major factor influencing microbial community structure and enzyme activities across seven biogeoclimatic zones in western Canada. *Soil Biol. Biochem.* **2012**, *44*, 9-20. doi: 10.1016/j.soilbio.2011.09.003.
8. Chen Y.L.; Chen L.Y.; Peng Y.F.; Ding J.Z.; Li F.; Yang G.B.; Kou D.; Liu L.; Fang K.; Zhang B.B.; Wang J.; Yang Y.H. Linking microbial C:N:P stoichiometry to microbial community and abiotic factors along a 3500-km grassland transect on the Tibetan Plateau. *Global Ecol. Biogeogr.* **2016**, *25*, 1416-1427. doi: 10.1111/geb.12500.
9. Frostergård, A. & Bååth, E. The use of phospholipid fatty acid analysis to estimate bacterial and fungal biomass in soil. *Biology and Fertility of Soils*. **1996**, *22*, 59–65. doi: 10.1007/BF00384433

**Table S4.** Repeated-measures ANOVA for soil physical and chemical properties in *Larix* plantations of different ages.

| Factor                         | df | Correlation index | Soil pH value | SWC  | Soil temperature | STC   | STN   | STP   | NO <sub>3</sub> <sup>-</sup> -N | NH <sub>4</sub> <sup>+</sup> -N | SAP   |
|--------------------------------|----|-------------------|---------------|------|------------------|-------|-------|-------|---------------------------------|---------------------------------|-------|
| Plantation age                 | 3  | F value           | 1.15          | 8.64 | 8.79             | 11.26 | 11.68 | 11.49 | 11.34                           | 11.51                           | 11.42 |
|                                |    | P value           | 0.38          | 0.01 | 0.01             | 0.01  | 0.01  | 0.01  | 0.01                            | 0.01                            | 0.01  |
| Sampling time                  | 3  | F value           | 1.11          | 7.51 | 8.14             | 6.34  | 8.57  | 7.36  | 8.84                            | 9.64                            | 10.18 |
|                                |    | P value           | 0.35          | 0.01 | 0.01             | 0.02  | 0.01  | 0.01  | 0.01                            | 0.01                            | 0.01  |
| Plantation age × Sampling time | 9  | F value           | 1.02          | 7.89 | 7.68             | 2.54  | 5.68  | 6.04  | 5.27                            | 6.92                            | 6.15  |
|                                |    | P value           | 0.31          | 0.01 | 0.01             | 0.19  | 0.02  | 0.02  | 0.02                            | 0.02                            | 0.02  |

**Table S5.** Repeated-measures ANOVA for soil microbial biomass and the stoichiometric ratios in soil and microorganisms in *Larix* plantations of different ages.

| Factor                         | df | Correlation index | STC:STN | STC:STP | STN:STP | MBC:MBN | MBC:MBP | MBN:MBP | Microbial biomass C | Microbial biomass N | Microbial biomass P |
|--------------------------------|----|-------------------|---------|---------|---------|---------|---------|---------|---------------------|---------------------|---------------------|
| Plantation age                 | 3  | F value           | 7.98    | 6.34    | 8.12    | 8.76    | 9.26    | 9.13    | 12.48               | 13.50               | 13.96               |
|                                |    | P value           | 0.01    | 0.01    | 0.01    | 0.01    | 0.01    | 0.01    | 0.01                | 0.01                | 0.01                |
| Sampling time                  | 3  | F value           | 1.06    | 3.14    | 0.49    | 2.45    | 1.57    | 1.35    | 4.48                | 6.79                | 2.91                |
|                                |    | P value           | 0.46    | 0.04    | 0.27    | 0.42    | 0.38    | 0.41    | 0.04                | 0.03                | 0.09                |
| Plantation age × Sampling time | 9  | F value           | 0.85    | 1.24    | 0.24    | 1.39    | 0.59    | 1.11    | 1.52                | 2.08                | 1.90                |
|                                |    | P value           | 0.57    | 0.18    | 0.79    | 0.15    | 0.48    | 0.37    | 0.17                | 0.07                | 0.26                |

**Table S6.** Repeated-measures ANOVA for microbe group biomass in *Larix* plantations of different ages.

| Factor                         | df | Correlation index | Total PLFAs | Gram - positive bacteria | Gram - negative bacteria | Bacteria | Fungi | Actinomycete |
|--------------------------------|----|-------------------|-------------|--------------------------|--------------------------|----------|-------|--------------|
| Plantation age                 | 3  | F value           | 5.29        | 5.81                     | 6.04                     | 6.76     | 5.93  | 6.11         |
|                                |    | P value           | 0.04        | 0.03                     | 0.02                     | 0.01     | 0.03  | 0.02         |
| Sampling time                  | 3  | F value           | 5.79        | 5.27                     | 5.34                     | 3.49     | 4.36  | 5.06         |
|                                |    | P value           | 0.04        | 0.04                     | 0.03                     | 0.02     | 0.03  | 0.02         |
| Plantation age × Sampling time | 9  | F value           | 2.11        | 1.96                     | 1.27                     | 1.54     | 1.98  | 2.04         |
|                                |    | P value           | 0.16        | 0.25                     | 0.28                     | 0.19     | 0.12  | 0.09         |

**Table S7.** Linkage of C:N, C:P and N:P ratios and pH value, moisture, temperature and nutrient concentrations in topsoil across 4 different plantation ages.

|          | Soil pH value | SWC     | Soil temperature | NO <sub>3</sub> <sup>-</sup> -N | NH <sub>4</sub> <sup>+</sup> -N | SAP      |
|----------|---------------|---------|------------------|---------------------------------|---------------------------------|----------|
| Soil C:N | 0.485*        | 0.586** | -0.093           | 0.091                           | 0.382                           | -0.629** |
| Soil C:P | 0.680**       | 0.869** | 0.188            | 0.352                           | 0.693**                         | -0.671** |
| Soil N:P | 0.624**       | 0.844** | 0.374            | 0.455*                          | 0.736**                         | -0.395   |

Soil C:N: total carbon : total nitrogen in soil; Soil C:P: total carbon : total phosphorus in soil; Soil N:P: total nitrogen : soil total phosphorus in soil. \* represents P<0.05; \*\* represents P<0.01.

**Table S8.** Linkage of microbial C:N, C:P and N:P ratios and pH value, moisture, temperature and nutrient concentrations in topsoil under 4 different plantation ages.

|                    | Soil pH value | SWC     | Soil temperature | STC     | STN     | STP     | NO <sub>3</sub> <sup>-</sup> -N | NH <sub>4</sub> <sup>+</sup> -N | SAP    |
|--------------------|---------------|---------|------------------|---------|---------|---------|---------------------------------|---------------------------------|--------|
| Soil microbial C:N | 0.444*        | 0.524** | 0.534**          | 0.611** | 0.597** | 0.580** | 0.378                           | 0.570**                         | -0.233 |
| Soil microbial C:P | 0.533**       | 0.564** | 0.624**          | 0.746** | 0.736** | 0.767** | 0.598**                         | 0.764**                         | -0.240 |
| Soil microbial N:P | 0.393         | 0.459*  | 0.531**          | 0.617** | 0.615** | 0.667** | 0.576**                         | 0.672**                         | -0.154 |

Soil microbial C:N: soil microbial biomass carbon : soil microbial biomass nitrogen; Soil microbial C:P: soil microbial biomass carbon : soil microbial biomass phosphorus; Soil microbial N:P: soil microbial biomass nitrogen : soil microbial biomass phosphorus. \* represents P<0.05; \*\* represents P<0.01.
